# Supplementary material for: Transcriptomic analysis of Ustilago maydis infecting Arabidopsis reveals important aspects of the fungus pathogenic mechanisms
Source: PubMed Central journal article supplement — Plant Signal Behav. 2013 Jun 11;8(8):e25059. doi: 10.4161/psb.25059 (PMC4005800; doi:10.4161/psb.25059), 2013-06-11
Supplement: psb-8-e25059-s01.pdf [file psb-8-e25059-s01.pdf]

## **Supplemental Material to:**

**Domingo Martínez-Soto, Angélica M. Robledo-Briones,  
Andrés A. Estrada-Luna and José Ruiz-Herrera**

**Transcriptomic analysis of Ustilago maydis infecting  
Arabidopsis reveals important aspects of the fungus  
pathogenic mechanisms**

**Plant Signaling & Behavior 2013; 8(8)  
<http://dx.doi.org/10.4161/psb.25059>**

**[www.landesbioscience.com/journals/psb/article/25059](http://www.landesbioscience.com/journals/psb/article/25059)**

**Supplementary Table S1.** *U. maydis* differentially expressed genes with the highest fold change during *A. thaliana* infection.

| ID      | Description                                                                       | Fold change during <i>Arabidopsis thaliana</i> infection |          |          |          |                                                  |          |         |          |
|---------|-----------------------------------------------------------------------------------|----------------------------------------------------------|----------|----------|----------|--------------------------------------------------|----------|---------|----------|
|         |                                                                                   | Days post-infection with the haploid strain FB2          |          |          |          | Days post-infection with the diploid strain Uid1 |          |         |          |
|         |                                                                                   | 1                                                        | 2        | 4        | 8        | 1                                                | 2        | 4       | 8        |
| um04111 | uncharacterized protein                                                           | 230.3 up                                                 | 198.3 up | -        | -        | -                                                | -        | -       | -        |
| um05812 | Related to Cyclohexanone monooxygenase                                            | 17.4 up                                                  | 66.4 up  | 174.0 up | 84.6 up  | 2.8 up                                           | 2.2 up   | 7.8 up  | 9.3 up   |
| um06085 | related to ATO2 - putative transmembrane protein involved in export of ammonia    | 137.7 up                                                 | 134.0 up | 130.3 up | 179.1 up | 88.4 up                                          | 25.3 up  | 38.7 up | 88.1 up  |
| um02379 | uncharacterized protein                                                           | 80.9 up                                                  | 124.5 up | 28.3 up  | 43.5 up  | 2.0 up                                           | 2.0 up   | 6.1 up  | 3.0up    |
| um05803 | related to acid phosphatase                                                       | 114.5 up                                                 | 105.1 up | 121.1 up | 75.1 up  | 106.0 up                                         | 121.9 up | 54.8 up | 46.7 up  |
| um11057 | related to OPT1 - High-affinity glutathione transporter                           | 90.2 up                                                  | 116.0 up | 89.7 up  | 89.3 up  | 5.6 up                                           | 4.2 up   | 41.5 up | 5.0 up   |
| um05968 | related to peptide transporter Mtd1                                               | 111.1 up                                                 | 80.4 up  | 11.4 up  | 2.1 up   | 35.0 up                                          | 6.7 up   | 12.8 up | 25.4 up  |
| um12015 | uncharacterized protein                                                           | 109.1 up                                                 | 110.2 up | 88.9 up  | 46.5 up  | 33.7 up                                          | 29.6 up  | 39.9 up | 29.6 up  |
| um06084 | uncharacterized protein                                                           | 79.2 up                                                  | 72.3 up  | 68.9 up  | 104.9 up | 38.2 up                                          | 12.7 up  | 24.0 up | 47.2 up  |
| um01528 | uncharacterized protein                                                           | 100.5 up                                                 | 94.5 up  | 20.4 up  | 2.9 up   | 99.0 up                                          | 20.9 up  | 56.3 up | 121.9 up |
| um01528 | uncharacterized protein                                                           | 100.5 up                                                 | 94.5 up  | 20.4 up  | 2.9 up   | 99.0 up                                          | 20.9 up  | 56.3 up | 121.9 up |
| um11002 | uncharacterized protein                                                           | 96.8 up                                                  | 94.8 up  | -        | -        | -                                                | -        | -       | -        |
| um05976 | uncharacterized protein                                                           | 17.4 up                                                  | 29.9 up  | 94.0 up  | 50.0 up  | 8.4 up                                           | 8.4 up   | 13.6 up | 11.2 up  |
| um04309 | probable Alpha-L-arabinofuranosidase precursor                                    | 8.1 up                                                   | 13.9 up  | 91.8 up  | 53.2 up  | 3.3 up                                           | 8.1 up   | 18.2 up | 32.9 up  |
| um03310 | related to ATO3 - plasma membrane protein with possible role in export of ammonia | 52.9 up                                                  | 57.3 up  | 63.3 up  | 57.8 up  | 72.9 up                                          | 79.0 up  | 81.8 up | 91.5 up  |
| um03664 | uncharacterized protein                                                           | 11.2 up                                                  | 33.7 up  | 64.0 up  | 90.9 up  | 9.2 up                                           | 5.9 up   | 10.8 up | 11.0 up  |
| um05791 | Related to Cytochrome P450                                                        | 13.9 up                                                  | 43.4 up  | 44.8 up  | 80.5 up  | 2.3 up                                           | 2.3 up   | 3.4 up  | 5.0 up   |
| um10608 | related to Quinate permease                                                       | 10.3 up                                                  | 39.8 up  | 42.0 up  | 80.3 up  | 8.6 up                                           | 13.6 up  | 20.2 up | 25.8 up  |
| um03049 | related to neutral amino acid permease                                            | 45.8 up                                                  | 72.7 up  | 56.1 up  | 71.5 up  | 46.0 up                                          | 46.6 up  | 78.9 up | 64.5 up  |
| um05122 | related to carboxylic acid transport protein JEN1                                 | 43.6 up                                                  | 57.3 up  | 64.4 up  | 78.6 up  | 20.5 up                                          | 17.9 up  | 21.2 up | 22.3 up  |
| um06253 | probable DUR3 - Urea permease                                                     | 76.5 up                                                  | 77.1 up  | 16.3 up  | 6.5 up   | 60.5 up                                          | 21.1 up  | 48.7 up | 59.1 up  |
| um05046 | uncharacterized protein                                                           | 51.7 up                                                  | 56.0 up  | 20.1 up  | 15.5 up  | 48.2 up                                          | 37.9 up  | 76.5 up | 48.4 up  |
| um01723 | related to Cytochrome P450                                                        | 64.1 up                                                  | 72.9 up  | 59.2 up  | 75.4 up  | 17.1 up                                          | 18.2 up  | 23.4 up | 28.8 up  |
| um11773 | uncharacterized protein                                                           | 75.1 up                                                  | 58.6 up  | 5.8 up   | -        | 2.2 up                                           | -        | -       | -        |
| um05802 | related to cell surface ferroxidase                                               | 74.4 up                                                  | 67.2 up  | 61.3 up  | 29.6 up  | 41.4 up                                          | 53.5 up  | 31.0 up | 23.3 up  |
| um01136 | uncharacterized protein                                                           | 74.5 up                                                  | 64.6 up  | 15.6 up  | 11.0 up  | 42.4 up                                          | 15.6 up  | 25.3 up | 45.0 up  |
| um03381 | uncharacterized protein                                                           | 73.8 up                                                  | 48.2 up  | 33.6 up  | 16.5 up  | 36.6 up                                          | 34.6 up  | 23.9 up | 13.8 up  |
| um05068 | Probable Arylsulfatase                                                            | 70.6 up                                                  | 60.3 up  | 8.2 up   | -        | -                                                | 2.4 down | -       | -        |

|         |                                                                               |         |         |         |          |          |         |         |         |
|---------|-------------------------------------------------------------------------------|---------|---------|---------|----------|----------|---------|---------|---------|
| um06335 | uncharacterized protein                                                       | 38.6 up | 65.4 up | 39.7 up | 53.8 up  | 15.9 up  | 14.7 up | 31.5 up | 27.7 up |
| um10581 | Related to Alcohol dehydrogenase class III chi chain                          | 5.8 up  | 26.0 up | 28.2 up | 63.0 up  | -        | -       | 3.1 up  | 3.7 up  |
| um11695 | Related to 2-epi-5-epi-valiolone synthase                                     | 49.8 up | 60.4 up | 5.1 up  | 2.2 up   | 3.8 up   | 4.2 up  | 7.8 up  | 11.9 up |
| um01465 | uncharacterized protein                                                       | 56.4 up | 66.4 up | -       | -        | -        | -       | -       | -       |
| um04347 | probable isp4 - oligopeptide transporter                                      | 33.8 up | 21.2 up | 59.7 up | 64.5 up  | 32.8 up  | 23.7 up | 27.1 up | 31.8 up |
| um11588 | related to copper transport protein                                           | 32.7 up | 21.6 up | 57.0 up | 24.5 up  | 38.6 up  | 23.9 up | 18.1 up | 12.9 up |
| um12316 | uncharacterized protein                                                       | 46.6 up | 45.6 up | 28.1 up | 23.2 up  | 51.3 up  | 47.1 up | 57.1 up | 47.4 up |
| um04304 | related to allantoinase                                                       | 4.6 up  | 23.5 up | 29.9 up | 53.2 up  | 2.0 up   | 3.5 up  | 6.5 up  | 26.8 up |
| um06487 | uncharacterized protein                                                       | 12.5 up | 11.3 up | 51.2 up | 50.3 up  | 3.9 up   | 3.7 up  | 4.3 up  | 7.1 up  |
| um11604 | related to Ferric reductase transmembrane component 1 precursor               | 30.7 up | 18.9 up | 51.4 up | 28.8 up  | 45.0 up  | 30.8 up | 27.7 up | 22.0 up |
| um05704 | uncharacterized protein                                                       | 34.2 up | 39.7 up | 48.9 up | 38.2 up  | 37.7 up  | 32.2 up | 40.2 up | 32.6 up |
| um06076 | Related to quinate transport protein                                          | 44.1 up | 48.0 up | 13.9 up | 7.3 up   | 6.2 up   | 4.5 up  | 11.2 up | 4.1 up  |
| um05967 | Related to salicylate 1-monooxygenase                                         | 25.3 up | 30.6 up | 43.2 up | 47.7 up  | 8.1 up   | 5.5 up  | 15.0 up | 14.3 up |
| um06350 | probable endo-1,4-beta-xylanase A precursor                                   | 2.8 up  | 2.9 up  | 10.3 up | 3.2 up   | 30.2 up  | 47.0 up | 33.4 up | 31.8 up |
| um11514 | probable High-affinity glucose transporter                                    | 25.8 up | 46.7 up | 24.5 up | 38.9 up  | 7.1 up   | 11.0 up | 20.8 up | 30.7 up |
| um10055 | Related to gamma-glutamyltransferase                                          | 44.7 up | 45.5 up | 12.7 up | 5.4 up   | 14.7 up  | 7.4 up  | 11.4 up | 10.3 up |
| um03149 | Related to molybdenum cofactor sulfurase                                      | 7.0 up  | 3.5 up  | 31.1 up | 44.7 up  | -        | -       | -       | -       |
| um04481 | Related to ADH2 - Alcohol dehydrogenase II                                    | 12.1 up | 44.6 up | 2.2 up  | 11.7 up  | 2.1 down | -       | 9.5 up  | 3.6 up  |
| um03398 | related to transesterase                                                      | 29.8 up | 29.5 up | 42.8 up | 39.4 up  | 27.8 up  | 23.2 up | 36.9 up | 32.2 up |
| um05247 | Related to methylcrotonyl-CoA carboxylase beta chain, mitochondrial precursor | 42.8 up | 13.1 up | 2.6 up  | -        | -        | -       | -       | -       |
| um03665 | Probable aldehyde dehydrogenase family 7 member A1                            | 3.6 up  | 22.0 up | 32.8 up | 42.2 up  | 3.4 up   | 2.5 up  | 9.2 up  | 9.3 up  |
| um12104 | Related to Cobalamin synthesis protein                                        | 2.7 up  | 9.9 up  | 41.9 up | 10.6 up  | 5.7 up   | 5.4 up  | 7.1 up  | 5.1 up  |
| um03585 | uncharacterized protein                                                       | 9.3 up  | 3.7 up  | 10.7 up | 10.4 up  | 41.5 up  | 25.4 up | 44.4 up | 37.6 up |
| um10608 | Related to Quinate permease                                                   | 10.3 up | 39.8 up | 42.0 up | 80.3 up  | 8.6 up   | 13.6 up | 20.2 up | 25.8 up |
| um03397 | uncharacterized protein                                                       | 8.0 up  | 10.4 up | 41.5 up | 29.8 up  | 19.4 up  | 16.7 up | 24.3 up | 13.6 up |
| um04247 | related to Cholinesterase precursor                                           | 27.2 up | 40.6 up | 29.1 up | 25.3 up  | 15.3 up  | 23.1 up | 23.3 up | 17.1 up |
| um03924 | Rep1 - repellent protein 1 precursor                                          | 39.3 up | 39.8 up | 37.4 up | 30.7 up  | 2.6 up   | 2.6 up  | 2.5 up  | 2.3 up  |
| um12341 | Related to Cytochrome P450                                                    | 5.9 up  | 4.4 up  | 39.5 up | 23.9 up  | -        | -       | -       | -       |
| um00842 | (probable aflatoxin efflux pump AFLT                                          | 9.6 up  | 8.6 up  | 12.1 up | 10.9 up  | 39.2 up  | 32.3 up | 32.8 up | 30.2 up |
| um06433 | Acu1 - K, P-type ATPase                                                       | 14.3 up | 3.9 up  | -       | 2.6 down | 14.7 up  | 24.6 up | 36.9 up | 30.0 up |
| um02215 | Related to dibenzothiophene desulfurizing enzyme                              | 31.5 up | 35.7 up | 11.1 up | 5.7 up   | 2.2 up   | -       | 2.1 up  | 2.4 up  |
| um04971 | probable OSM1 - fumarate reductase                                            | 15.9 up | 30.8 up | 34.0 up | 37.0 up  | 9.9 up   | 12.1 up | 21.5 up | 25.7 up |
| um04971 | Probable OSM1 - fumarate reductase                                            | 15.9 up | 30.8 up | 34.0 up | 37.0 up  | 9.9 up   | 12.1 up | 21.5 up | 25.7 up |
| um02152 | uncharacterized protein                                                       | 3.5 up  | 3.2 up  | 5.8 up  | 8.5 up   | 16.4 up  | 19.7 up | 30.4 up | 34.8 up |

|         |                                                                                |         |         |         |          |         |         |         |          |
|---------|--------------------------------------------------------------------------------|---------|---------|---------|----------|---------|---------|---------|----------|
| um11922 | Related to Chitin deacetylase precursor                                        | 25.3 up | 34.0 up | 31.6 up | 28.7 up  | 11.2 up | 10.0 up | 15.7 up | 12.9 up  |
| um03619 | Related to multidrug resistant protein                                         | 25.0 up | 34.0 up | -       | 3.2 up   | -       | -       | 2.2 up  | 3.1 down |
| um05981 | Related to TPO1 - Vacuolar polyamine-H+ antiporter                             | 22.1 up | 33.8 up | 18.7 up | 21.5 up  | 6.1 up  | 4.9 up  | 6.0 up  | 3.5 up   |
| um00913 | Glo2 - Glyoxaloxidase 2                                                        | 18.8 up | 33.7 up | 4.4 up  | 3.7 up   | 15.5 up | 10.5 up | 26.8 up | 16.1 up  |
| um04841 | uncharacterized protein                                                        | 22.0 up | 33.4 up | 5.8 up  | 5.3 up   | 27.4 up | 7.5 up  | 15.3 up | 30.8 up  |
| um06332 | Egl1 - Endoglucanase 1 precursor (egl1)                                        | 19.0 up | 33.2 up | 30.3 up | 9.3 up   | -       | -       | 4.4 up  | 3.5 up   |
| um04987 | uncharacterized protein                                                        | 33.1 up | 20.2 up | 9.4 up  | 6.4 up   | 4.4 up  | -       | -       | -        |
| um02865 | uncharacterized protein                                                        | 27.6 up | 32.4 up | 17.6 up | 25.6 up  | 15.4 up | 13.3 up | 17.2 up | 16.1 up  |
| um03148 | Related to ATP-binding cassette protein (ABC) transporter                      | 4.0 up  | 2.7 up  | 11.7 up | 31.8 up  | -       | 2.1 up  | 4.1 up  | 3.1 up   |
| um01863 | related to Cytochrome P450                                                     | 7.3 up  | 12.3 up | 7.8 up  | 21.9 up  | 25.0 up | 20.6 up | 31.7 up | 31.3 up  |
| um05254 | uncharacterized protein                                                        | 31.2 up | 14.3 up | 6.2 up  | 3.9 up   | 15.0 up | 5.0 up  | 3.0 up  | 9.0 up   |
| um04503 | Related to Alpha-N-acetylgalactosaminidase precursor                           | 14.6 up | 16.2 up | 31.0 up | 20.9 up  | 4.4 up  | 2.0 up  | 3.2 up  | 2.0 up   |
| um05819 | uncharacterized protein                                                        | 16.9 up | 20.7 up | 30.8 up | 2.3 up   | -       | -       | 3.0 up  | 5.0 up   |
| um00738 | uncharacterized protein                                                        | 30.5 up | 15.1 up | 15.4 up | 13.6 up  | 14.5 up | 18.9 up | 13.5 up | 12.1 up  |
| um02008 | related to TNA1 - high affinity nicotinic acid plasma membrane permease        | 9.3 up  | 23.6 up | 20.1 up | 30.1 up  | 7.6 up  | 10.3 up | 12.8 up | 18.7 up  |
| um04027 | uncharacterized protein                                                        | 28.5 up | 28.6 up | 30.4 up | 25.3 up  | 6.5 up  | 5.8 up  | 7.5 up  | 5.5 up   |
| um02301 | Related to C2H2-type zinc finger protein                                       | 26.5 up | 26.6 up | 27.1 up | 30.4 up  | 5.4 up  | 4.7 up  | 5.6 up  | 7.5 up   |
| um10544 | related to BAS1 - Myb-related transcription factor                             | 29.9 up | 5.2 up  | 4.3 up  | -        | 10.0 up | 3.0 up  | -       | -        |
| um01656 | Probable sugar transporter                                                     | 26.1 up | 29.8 up | 22.6 up | 25.7 up  | 3.6 up  | 3.2 up  | 4.7 up  | 4.3 up   |
| um01949 | uncharacterized protein                                                        | 28.9 up | 6.6 up  | 7.6 up  | 4.1 up   | 21.1 up | 29.4 up | 11.8 up | 6.9 up   |
| um12300 | Related to methylcrotonyl-coa carboxylase alpha chain, mitochondrial precursor | 28.8 up | 3.1 up  | 3.4 up  | -        | -       | -       | -       | -        |
| um04305 | Probable AMS1 - alpha-mannosidase                                              | 4.0 up  | 14.2 up | 16.3 up | 28.1 up  | 2.7 up  | 4.4 up  | 6.2 up  | 15.9 up  |
| um03402 | Related to ALD4 - aldehyde dehydrogenase, mitochondrial                        | 6.7 up  | 17.0 up | 14.9 up | 26.6 up  | -       | -       | 2.9 up  | 3.9 up   |
| um05809 | Related to KRE6 - glucan synthase subunit                                      | 19.0 up | 26.4 up | 7.6 up  | 9.4 up   | 4.0 up  | 4.3 up  | 7.5 up  | 5.2 up   |
| um12315 | uncharacterized protein                                                        | -       | -       | 2.2 up  | -        | 19.8 up | 20.6 up | 19.13up | 26.2 up  |
| um06470 | related to BAS1 - Myb-related transcription factor                             | 7.4 up  | 5.5 up  | 26.0 up | 9.181 up | -       | -       | -       | -        |
| um06439 | uncharacterized protein                                                        | -       | -       | 3.3 up  | 3.5 up   | 3.6 up  | 11.4 up | 17.7 up | 25.7 up  |
| um12175 | related to BAS1 - Myb-related transcription factor                             | 4.4 up  | 16.0 up | 18.3 up | 25.5 up  | -       | -       | 2.5 up  | 3.1 up   |
| um05411 | Probable quinate permease                                                      | 4.4 up  | 11.7 up | 15.9 up | 25.3 up  | 6.7 up  | 7.3 up  | 7.4 up  | 7.8 up   |
| um06138 | Probable PTR2 - Di- and tripeptide permease                                    | 25.1 up | 18.6 up | 10.4 up | 19.0 up  | 4.2 up  | 2.7 up  | 5.4 up  | 8.2 up   |
| um05074 | Probable Cytochrome P450 monooxygenase/Phenylacetate hydroxylase               | 24.9 up | 10.5 up | 4.9 up  | 3.7 up   | 6.2 up  | 3.7 up  | 4.8 up  | -        |
| um10529 | uncharacterized protein                                                        | 18.3 up | 16.4 up | 20.5 up | 24.8 up  | 3.3 up  | 2.5 up  | 4.3 up  | 5.2 up   |
| um04248 | uncharacterized protein                                                        | 14.9 up | 15.5 up | 17.9 up | 14.9 up  | 24.7 up | 20.8 up | 22.7 up | 13.1 up  |
| um01424 | Probable Cytochrome P450 monooxygenase/Phenylacetate hydroxylase               | 3.8 up  | 11.4 up | 13.0 up | 24.2 up  | -       | 2.0 up  | 3.5 up  | 3.6 up   |

|         |                                                                                                            |           |           |           |           |           |           |           |           |
|---------|------------------------------------------------------------------------------------------------------------|-----------|-----------|-----------|-----------|-----------|-----------|-----------|-----------|
| um11117 | uncharacterized protein                                                                                    | -         | 2.6 up    | 12.6 up   | 24.2 up   | 7.2 up    | 8.7 up    | 2.3 up    | 4.2 up    |
| um01984 | Probable ADH1 - alcohol dehydrogenase I                                                                    | 20.9 up   | 23.4 up   | 24.0 up   | 23.4 up   | 12.4 up   | 11.5 up   | 15.5 up   | 12.7 up   |
| um11051 | uncharacterized protein                                                                                    | 2.2 up    | 5.0 up    | 5.8 up    | 5.4 up    | 8.0 up    | 10.6 up   | 15.4 up   | 24.0 up   |
| um10545 | uncharacterized protein                                                                                    | 23.8 up   | 8.0 up    | 3.7 up    | 3.9 up    | 8.3 up    | 4.2 up    | 5.9 up    | 5.7 up    |
| um12178 | Related to 5-carboxyvanillate decarboxylase                                                                | 9.5 up    | 16.2 up   | 22.4 up   | 23.7 up   | 4.0 up    | 4.4 up    | 3.8 up    | 3.3 up    |
| um01823 | uncharacterized protein                                                                                    | 15.7 up   | 23.3 up   | 8.3 up    | 5.2 up    | 9.4 up    | 5.5 up    | 15.1 up   | 6.3 up    |
| um01425 | Probable homogentisate 1,2-dioxygenase                                                                     | 4.9 up    | 7.9 up    | 10.7 up   | 23.3 up   | 3.2 up    | 3.2 up    | 5.1 up    | 5.8 up    |
| um01888 | Probable SERINE-TYPE CARBOXYPEPTIDASE F PRECURSOR                                                          | 23.1 up   | 15.8 up   | 18.2 up   | 15.9 up   | -         | -         | -         | -         |
| um00205 | Related to HSP12 - heat shock protein                                                                      | 23.1 up   | 14.3 up   | -         | 2.1 up    | 2.1 up    | -         | -         | -         |
| um11430 | related to CSR1 - phosphatidylinositol transfer protein                                                    | 15.8 up   | 22.9 up   | 22.5 up   | 21.8 up   | 12.3 up   | 8.9 up    | 16.3 up   | 11.7 up   |
| um10070 | related to Benzoate 4-monooxygenase                                                                        | 5.2 up    | 9.3 up    | 15.2 up   | 16.6 up   | 13.3 up   | 12.1 up   | 18.1 up   | 22.7 up   |
| um03995 | Related to JLP1 - Fe(II)-dependent sulfonate/alpha-ketoglutarate dioxygenase                               | 22.6 up   | 20.8 up   | 12.2 up   | 6.1 up    | 2.4 up    | -         | -         | -         |
| um04353 | Related to glycosyl transferase, group 2 family protein                                                    | 22.3 up   | 22.4 up   | 15.9 up   | 6.1 up    | 13.3 up   | 10.3 up   | 14.9 up   | 14.0 up   |
| um01868 | Related to GIT1 - Glycerophosphoinositol transporter also able to mediate low-affinity phosphate transport | 15.6 up   | 20.5 up   | 22.4 up   | 19.8 up   | 12.2 up   | 11.5 up   | 18.9 up   | 16.5 up   |
| um10474 | uncharacterized protein                                                                                    | 16.3 up   | 22.2 up   | 17.5 up   | 16.3 up   | 5.6 up    | 6.3 up    | 8.4 up    | 8.6 up    |
| um02157 | uncharacterized protein                                                                                    | 4.1 up    | 11.4 up   | 5.7 up    | 3.9 up    | 13.3 up   | 6.5 up    | 21.8 up   | 17.5 up   |
| um10881 | Probable ribonuclease T1                                                                                   | 14.5 up   | 6.5 up    | 21.7 up   | 5.7 up    | -         | -         | -         | -         |
| um03415 | Related to putative monooxygenase                                                                          | 3.9 up    | 14.8 up   | 21.3 up   | 14.4 up   | 4.6 up    | 5.5 up    | 9.2 up    | 11.0 up   |
| um04680 | Related to Monocarboxylate transporter                                                                     | 8.8 up    | 13.8 up   | 16.9 up   | 21.1 up   | 6.0 up    | 4.9 up    | 8.0 up    | 8.1 up    |
| um00116 | Related to nicotinamide mononucleotide permease                                                            | 9.8 up    | 20.9 up   | 12.7 up   | 20.2 up   | 3.0 up    | 4.0 up    | 9.9 up    | 6.8 up    |
| um03076 | uncharacterized protein                                                                                    | 20.7 up   | 15.3 up   | 18.3 up   | 10.3 up   | 8.7 up    | 6.8 up    | 8.6 up    | 6.6 up    |
| um02162 | uncharacterized protein                                                                                    | -         | -         | -         | -         | 17.4 up   | 21.1 up   | 20.7 up   | 18.8 up   |
| um03023 | Related to Ribonuclease Trv                                                                                | 20.5 up   | 14.0 up   | 18.3 up   | 10.3 up   | 11.1 up   | 14.6 up   | 13.7 up   | 8.5 up    |
| um10946 | Related to TNA1 - High affinity nicotinic acid plasma membrane permease                                    | 20.4 up   | 20.5 up   | 6.0 up    | 3.5 up    | 14.3 up   | 6.0 up    | 10.7 up   | 20.1 up   |
| um03932 | uncharacterized protein                                                                                    | 3.7 up    | 13.8 up   | 13.3 up   | 19.4 up   | 3.1 up    | 6.2 up    | 20.3 up   | 8.8 up    |
| um03474 | related to TNA1 - high affinity nicotinic acid plasma membrane permease                                    | 2.3 up    | 7.3 up    | 15.7 up   | 20.2 up   | -         | -         | 3.5 up    | 6.8 up    |
| um05301 | uncharacterized protein                                                                                    | 8.0 up    | 6.5 up    | 11.0 up   | 8.675 up  | 17.7 up   | 20.1 up   | 16.2 up   | 15.2 up   |
| um12068 | Related to N-acetylglucosaminyltransferase (C-terminal fragment)                                           | 20.0 up   | 13.1 up   | 12.0 up   | 11.0 up   | 4.3 up    | 5.0 up    | 3.4 up    | 7.1 up    |
| um05528 | uncharacterized protein                                                                                    | 12.8 up   | -         | 4.0 up    | -         | 20.0 up   | 24.8 up   | 5.8 up    | 4.4 up    |
| um11080 | uncharacterized protein                                                                                    | 10.1 down | 17.8 down | 18.0 down | 20.6 down | 6.4 down  | 6.6 down  | 4.7 down  | 3.2 down  |
| um11815 | uncharacterized protein                                                                                    | 11.8 down | 12.2 down | 10.9 down | 17.8 down | 18.7 down | 21.7 down | 21.5 down | 20.7 down |
| um00388 | uncharacterized protein                                                                                    | 19.1 down | 23.2 down | 20.7 down | 18.8 down | -         | -         | -         | -         |
| um00204 | related to Ca <sup>2+</sup> -transporting ATPase                                                           | 4.3 down  | 14.5 down | 9.1 down  | 14.8 down | 23.5 down | 18.7 down | 5.8 down  | 4.2 down  |

|         |                                                                                                    |           |           |           |           |             |             |             |             |
|---------|----------------------------------------------------------------------------------------------------|-----------|-----------|-----------|-----------|-------------|-------------|-------------|-------------|
| um11244 | related to FRE4 - Ferric reductase                                                                 | 12.4 down | 11.3 down | 9.1 down  | 12.3 down | 23.7 down   | 21.0 down   | 13.5 down   | 12.9 down   |
| um03116 | Acyltransferase involved in MEL production                                                         | 2.2 up    | -         | 7.3 up    | -         | 2.1 down    | 9.2 down    | 24.2 down   | 18.9 down   |
| um03776 | uncharacterized protein                                                                            | 2.9 down  | 8.4 down  | 12.7 down | 17.6 down | 18.5 down   | 13.1 down   | 23.4 down   | 24.6 down   |
| um05782 | Capsule-associated protein-like protein                                                            | 7.3 down  | 14.3 down | 6.2 down  | 11.7 down | 8.9 down    | 9.3 down    | 24.8 down   | 18.6 down   |
| um04118 | uncharacterized protein                                                                            | 19.8 down | 20.4 down | 25.5 down | 15.0 down | 5.9 down    | 6.0 down    | 6.4 down    | 8.0 down    |
| um11372 | ENA2 - Plasma membrane P-type ATPase (N-terminal fragment - extended on um_contig_1.67 as um12056) | 2.6 down  | 3.9 down  | 18.2 down | 7.4 down  | 25.8 down   | 24.2 down   | 17.2 down   | 27.0 down   |
| um12056 | - probable ENA2 -                                                                                  | -         | 2.3 down  | 6.0 down  | 7.4 down  | 26.2 down   | 18.6 down   | 15.9 down   | 29.0 down   |
| um01048 | Odc - ornithine decarboxylase                                                                      | 2.5 down  | 2.6 down  | 2.9 down  | 2.5 down  | 27.0 down   | 27.9 down   | 21.6 down   | 27.1 down   |
| um01983 | uncharacterized protein                                                                            | 28.1 down | 3.5 down  | 5.4 down  | 7.0 down  | 3.0 down    | 2.5 down    | 3.7 down    | 2.8 down    |
| um05787 | uncharacterized protein                                                                            | 13.8 down | 28.3 down | 15.8 down | 31.6 down | 4.1 down    | 4.5 down    | 19.4 down   | 15.2 down   |
| um02497 | uncharacterized protein                                                                            | 36.4 down | 27.6 down | 18.2 down | 16.1 down | 9.2 down    | 11.1 down   | 5.2 down    | 7.9 down    |
| um02763 | uncharacterized protein                                                                            | 16.2 down | 37.4 down | 3.4 down  | 5.9 down  | 14.6 down   | 16.8 down   | 8.9 down    | 5.8 down    |
| um01434 | Fer3 - Siderophore peptide synthetase involved in ferrichromeA biosynthesis                        | 14.0 down | 11.4 down | 7.7 down  | 20.6 down | 37.076 down | 40.296 down | 18.912 down | 24.335 down |
| um00082 | uncharacterized protein                                                                            | 41.6 down | 36.9 down | 20.1 down | 23.0 down | 10.4 down   | 8.5 down    | 8.6 down    | 3.9 down    |
| um04791 | related to G1/S-specific cyclin                                                                    | -         | -         | -         | -         | 24.6 down   | 18.2 down   | 38.4 down   | 26.2 down   |
| um01439 | Fer9 - related to FRE3 - Ferric reductase, reduces siderophore-bound iron prior to uptake          | 9.3 down  | 10.8 down | 5.0 down  | 15.4 down | 41.0 down   | 45.8 down   | 23.0 down   | 21.1 down   |
| um11339 | Fer7 - related to Siderophore iron transporter 3                                                   | 3.0 down  | 2.7 down  | -         | 2.7 down  | 47.3 down   | 24.3 down   | 3.0 down    | 7.2 down    |
| um01432 | Fer5 - related to N6-hydroxylysine acetyl transferase                                              | 3.4 down  | 6.8 down  | 5.3 down  | 11.9 down | 47.4 down   | 36.9 down   | 12.1 down   | 18.2 down   |
| um00309 | uncharacterized protein                                                                            | 9.1 down  | 27.3 down | 18.6 down | 39.1 down | 47.5 down   | 44.1 down   | 38.1 down   | 39.0 down   |
| um01947 | Related to cytochrome-c peroxidase precursor                                                       | 2.6 down  | 16.5 down | 14.8 down | 48.2 down | -           | -           | 3.0 down    | 3.6 down    |
| um10221 | uncharacterized protein                                                                            | -         | 5.9 down  | 8.1 down  | 13.5 down | 20.7 down   | 13.5 down   | 50.2 down   | 40.9 down   |
| um05785 | Acyl transferase-like protein                                                                      | 5.9 down  | 15.3 down | 9.0 down  | 18.8 down | 8.2 down    | 4.8 down    | 58.5 down   | 29.8 down   |
| um01433 | Fer4 - related to Enoyl-CoA hydratase                                                              | 13.5 down | 20.1 down | 8.6 down  | 36.0 down | 61.4 down   | 56.7 down   | 45.1 down   | 49.1 down   |
| um03642 | uncharacterized protein                                                                            | 2.0 down  | 2.7 down  | -         | -         | 37.0 down   | 37.6 down   | 76.8 down   | 38.5 down   |
| um03524 | related to peroxisomal amine oxidase (copper-containing)                                           | 3.6 down  | 2.9 down  | 2.9 down  | -         | 80.5 down   | 79.1 down   | 63.2 down   | 73.8 down   |
| um10186 | uncharacterized protein                                                                            | 7.6 down  | 15.0 down | 21.8 down | 42.7 down | 11.0 down   | 13.6 down   | 119.2 down  | 102.1 down  |



|         |                           |          |          |          |          |          |          |          |         |          |
|---------|---------------------------|----------|----------|----------|----------|----------|----------|----------|---------|----------|
| um10070 |                           | 5.6 up   | 9.6 up   | 15.9 up  | 17.7 up  | 13.2 up  | 12.1 up  | 18.1 up  | 21.8 up | 12.8 up  |
| um02196 |                           | 1.4 down | -        | -        | -        | 2.6 up   | 2.7 up   | 2.2 up   | 2.6 up  | 90.3 up  |
| um02197 |                           | 1.9 up   | 2.5 up   | 2.9 up   | 2.9 up   | 3.1 up   | 3.0 up   | 4.3 up   | 4.0 up  |          |
| um02472 | 5B( non pathogenic)       | 2.2 down | -        | -        | -        | 3.1 down | 2.2 down | -        | -       | 5.2 down |
| um02476 |                           | -        | -        | -        | -        | 2.2 down | 2.3 down | -        | -       | 1.7 down |
| um11414 | 6A (virulence reduced)    | 3.5 up   | 2.9 up   | 3.4 up   | 3.0 up   | 5.5 up   | 6.4 up   | 5.1 up   | 5.4 up  |          |
| um02533 |                           | -        | -        | -        | -        | -        | -        | -        | 3.1 up  | 65.1 up  |
| um11415 |                           | 2.1 up   | 3.2 up   | -        | -        | 2.4 down | -        | -        | 2.3 up  |          |
| um11416 |                           | -        | 2.3 down | -        | -        | -        | -        | -        | -       | 32 up    |
| um02537 |                           | -        | -        | -        | -        | 2.4 up   | 2.0 up   | -        | -       | 41.8 up  |
| um02538 |                           | -        | -        | -        | -        | -        | -        | -        | -       |          |
| um11417 |                           | 2.2 down | 2.7 down | 2.0 down | 2.4 down | -        | 2.3 up   | -        | 2.9 up  |          |
| um02540 |                           | 2.1 down | 2.4 down | -        | -        | 4.9 up   | 4.2 up   | 3.3 up   | 4.2 up  | 2.9 up   |
| um02541 |                           | 2.6 down | 3.6 down | 2.7 down | 3.1 down | 2.0 up   | -        | 2.1 up   | 2.5 up  |          |
| um02542 |                           | -        | -        | -        | -        | 5.2 up   | 5.4 up   | 5.7 up   | 5.3 up  | 2.5 down |
| um03200 | 8A (virulence unaffected) | -        | -        | -        | -        | 2.2 down | 2.4 down | 2.3 down | -       |          |
| um10403 |                           | -        | 2.3 up   | -        | -        | -        | -        | -        | -       | 315 up   |
| um03315 | 9A (virulence unaffected) | 3.0 up   | 2.5 up   | 2.7 up   | 2.4 up   | -        | 2.0 down | -        | -       |          |
| um03316 |                           | 3.2 up   | 2.3 up   | 2.4 up   | -        | 2.3 up   | 2.6 up   | 1.7 up   | 2.1 up  | 1.8 down |
| um03316 |                           | 3.5 up   | 2.1 up   | 2.5 up   | -        | -        | -        | 1.0      | -       |          |
| um03743 | 10A (virulence reduced)   | 2.2 down | 2.5 down | 2.4 down | 2.0 down | -        | -        | -        | -       | 2.5 down |
| um03744 |                           | 2.4 down | 2.2 down | 2.2 down | 2.3 down | -        | -        | -        | -       | 35.1 up  |
| um03750 |                           | -        | -        | 3.6 up   | 2.8 up   | -        | -        | -        | -       |          |
| um03751 |                           | -        | 2.4 down | -        | -        | 2.4      | -        | 2.5      | -       | 18.9 up  |



|         |                                      |                             |          |          |          |          |          |          |          |          |
|---------|--------------------------------------|-----------------------------|----------|----------|----------|----------|----------|----------|----------|----------|
|         |                                      |                             |          |          |          | down     |          | down     |          |          |
| um03753 |                                      | 5.7 up                      | 4.9 up   | 5.0 up   | 4.7 up   | 3.7 up   | 3.9 up   | 2.4 up   | 3.6 up   | 1.6 up   |
| um03754 |                                      | -                           | 2.4 up   | -        | -        | -        | -        | -        | -        |          |
| um10660 | 19A (virulence dramatically Reduced) | 2.4 up                      | -        | -        | -        | 3.1 up   | 3.3 up   | 2.6 up   | 2.4 up   | 2 up     |
| um05293 |                                      | 3.5 up                      | 3.8 up   | 3.6 up   | 3.6 up   | 2.4 up   | 2.2 up   | 2.5 up   | 2.3 up   | 2.1 down |
| um05296 |                                      | -                           | -        | -        | -        | -        | 2.1 up   | 2.2 up   | 2.6 up   | 11.3 up  |
| um05308 |                                      | -                           | -        | -        | -        | -        | 1.2 up   | 2.2 down | -        | 4.3 up   |
| um05310 |                                      | 2.4 down                    | 3.1 down | 2.2 down | 2.7 down | 2.5 down | 2.6 down | 6.4 down | 4.7 down | 28.2 up  |
| um10557 |                                      | -                           | -        | -        | -        | -        | 2.0 up   | -        | -        |          |
| um05319 |                                      | -                           | -        | -        | -        | 2.0 up   | 3.0 up   | -        | -        | 2.6 up   |
| um11233 |                                      | 22A ( virulence unaffected) | 2.0 down | 1.2 down | 1.2 down | -        | -        | -        | -        | -        |
| um06221 | 2.6 down                             |                             | 2.2 down | 3.3 down | 2.6 down | -        | -        | 2.1 down | -        |          |
| um06224 | 2.2 down                             |                             | -        | 2.3 down | -        | 2.7 down | 2.4 down | 2.1 down | 2.3 down | 3.1 down |

**supplementary Table S3. Genes coding for transcription factors differentially regulated in *U. maydis* during *A. thaliana* infection.**

| ID      | Description                                                          | Name or Domain                                                   | Reference                                           | Fold change during <i>Arabidopsis thaliana</i> infection |          |          |          |                                                  |          |          |          |          |
|---------|----------------------------------------------------------------------|------------------------------------------------------------------|-----------------------------------------------------|----------------------------------------------------------|----------|----------|----------|--------------------------------------------------|----------|----------|----------|----------|
|         |                                                                      |                                                                  |                                                     | Days post-infection with the haploid strain FB2          |          |          |          | Days post-infection with the diploid strain Uid1 |          |          |          |          |
|         |                                                                      |                                                                  |                                                     | 1                                                        | 2        | 4        | 8        | 1                                                | 2        | 4        | 8        | 16       |
| um00174 | Related to transcriptional regulator protein SPT6                    | SPT6                                                             | UniProt                                             | 2.4 down                                                 | -        | -        | -        | 2.6 down                                         | 2.8 down | 2.4 down | 2.4 down | 2.4 down |
| um00195 | Putative protein                                                     | gal4, Zn clus                                                    | UniProt                                             | 4.8 down                                                 | 3.6 down | 3.9 down | 2.5 down | 4.9 down                                         | 4.8 down | 2.6 down | 2.6 down | 2.6 down |
| um00300 | Conserved hypothetical protein                                       | FSTF, GAL4                                                       | UniProt                                             | 5.5 down                                                 | 4.4 down | 4.9 down | 3.7 down | 6.2 down                                         | 4.9 down | 4.8 down | 4.8 down | 4.8 down |
| um00316 | Conserved hypothetical protein                                       | gal4, Zn clus                                                    | UniProt                                             | 2.8 down                                                 | -        | 2.9 down | -        | 2.0 down                                         | 3.2 down | 2.4 down | 2.4 down | 2.4 down |
| um00332 | related to transcription factor TFIIC subunit                        | TFIIC                                                            | MIPS <i>Ustilago maydis</i> DataBase                | -                                                        | -        | -        | 2.0 up   | -                                                | -        | -        | -        | -        |
| um00377 | Conserved hypothetical protein                                       | FSTF                                                             | Pfam, MIPS <i>Ustilago maydis</i> DataBase, UniProt | -                                                        | -        | -        | 2.1 up   | -                                                | -        | -        | -        | -        |
| um00467 | Conserved hypothetical protein                                       | gal4, Zn clus                                                    | UniProt                                             | -                                                        | -        | 2.1 down | -        | -                                                | -        | -        | -        | -        |
| um00483 | Putative protein                                                     | bZIP                                                             | PF00170, UniProt                                    | 4.0 down                                                 | 3.6 down | 2.7 down | 2.4 down | 2.4 down                                         | 2.3 down | -        | -        | -        |
| um00489 | um11825                                                              | Conserved hypothetical protein                                   | Homeodomain                                         | PF05920, UniProt                                         | 2.2 down | -        | -        | -                                                | 2.4 down | 2.5 down | -        | -        |
| um00491 | Related to BRF1 - TFIIB subunit, 70 kD                               | TFIIB                                                            | UniProt                                             | 2.0 down                                                 | 2.1 down | -        | -        | -                                                | -        | -        | -        | -        |
| um00523 | Related to CDC36 - transcription factor                              | CDC36                                                            | MIPS <i>Ustilago maydis</i> DataBase                | 2.7 down                                                 | 2.5 down | 2.6 down | 2.0 down | 2.3 down                                         | 2.1 down | -        | -        | -        |
| um00528 | Conserved hypothetical protein                                       | FSTF, GAL4                                                       | UniProt                                             | 2.5 up                                                   | 2.1 up   | 3.9 up   | 3.4 up   | -                                                | -        | 2.8 up   | 2.8 up   | 2.8 up   |
| um00533 | Related to PPR1 - transcription factor regulating pyrimidine pathway | PPR1 FSTF "GAL4"                                                 | UniProt                                             | -                                                        | -        | -        | -        | 2.1 down                                         | 2.4 down | -        | -        | -        |
| um00577 | um12052                                                              | bE1 - b mating type locus, bE1 allele                            | bE1                                                 | PF05920, PF05722, PF05062, UniProt                       | -        | -        | -        | -                                                | 2.0 up   | 2.6 up   | 2.6 up   | 2.6 up   |
| um00578 |                                                                      | bW1 - b mating type locus, bW1 allele                            | bW1                                                 | PF00046, UniProt                                         | -        | -        | -        | -                                                | -        | 2.6 up   | 5.3 up   | 5.3 up   |
| um00669 | Related to TFB3 - TFIIF subunit (transcription/repair factor)        | MAT1, TFB3 - TFIIF                                               | KEGG                                                | 2.2 down                                                 | 2.1 down | 2.2 down | 2.4 down | -                                                | -        | -        | -        | -        |
| um00750 | Putative protein                                                     | gal4, Zn clus                                                    | UniProt                                             | 3.3 down                                                 | 3.8 down | -        | -        | 3.1 down                                         | 2.6 down | 2.5 down | 2.5 down | 2.5 down |
| um00767 | Hypothetical protein                                                 | bZIP                                                             | UniProt                                             | -                                                        | -        | -        | -        | 2.2 down                                         | 2.4 down | -        | -        | -        |
| um00808 | Conserved hypothetical protein                                       | Homeodomain, HMG                                                 | PF00505                                             | 2.5 down                                                 | -        | -        | -        | 2.7 down                                         | 2.9 down | 2.6 down | 2.6 down | 2.6 down |
| um00841 | Conserved hypothetical protein                                       | gal4 Zn clus                                                     | UniProt                                             | 5.2 up                                                   | 5.5 up   | 7.4 up   | 7.2 up   | 9.0 up                                           | 8.1 up   | 8.5 up   | 8.5 up   | 8.5 up   |
| um00895 | Conserved hypothetical protein                                       | Znf GATA                                                         | UniProt                                             | 2.1 down                                                 | -        | -        | -        | 2.3 down                                         | -        | -        | -        | -        |
| um00922 | Related to TFIIF basal transcription factor complex p34 subunit      | TFIIF                                                            | KEGG                                                | -                                                        | -        | -        | -        | -                                                | 2.0 up   | 2.1 up   | 2.1 up   | 2.1 up   |
| um00946 | Uncharacterized protein                                              | Zinc finger, C2H2-like                                           | MIPS <i>Ustilago maydis</i> DataBase                | 5.0 up                                                   | 5.2 up   | 4.3 up   | 5.9 up   | -                                                | -        | 2.4 up   | 2.4 up   | 2.4 up   |
| um01016 | Conserved hypothetical protein                                       | efg1                                                             | Zavrel, et al. <sup>83</sup>                        | 2.4 down                                                 | 2.4 down | 2.6 down | -        | -                                                | 2.0 up   | -        | -        | -        |
| um01025 | Conserved hypothetical protein                                       | gal4 Zn clus                                                     | UniProt                                             | 2.1 down                                                 | 2.4 down | 2.4 down | 2.2 down | -                                                | -        | 2.0 up   | 2.0 up   | 2.0 up   |
| um01042 | Putative protein                                                     | Fork head                                                        | SUPERFAMILY, UniProt                                | -                                                        | -        | -        | -        | 2.1 down                                         | -        | -        | -        | -        |
| um01050 | Urbs1 - Siderophore biosynthesis regulatory protein URBS1            | Urbs1                                                            | UniProt                                             | 6.1 down                                                 | 6.0 down | 4.3 down | 2.8 down | 2.2 down                                         | 2.7 down | -        | -        | -        |
| um01104 | Conserved hypothetical protein                                       | TFIIE2-beta                                                      | KEGG, UniProt                                       | 2.3 up                                                   | -        | -        | -        | 5.9 up                                           | 5.0 up   | 2.7 up   | 2.7 up   | 2.7 up   |
| um01371 | um01371.2                                                            | Related to RRN3 - RNA polymerase I specific transcription factor | RRN3                                                | MIPS <i>Ustilago maydis</i> DataBase                     | 2.3 down | -        | -        | -                                                | 2.0 down | -        | -        | -        |
| um01390 | Conserved hypothetical protein                                       | HMG                                                              | PF00505                                             | 2.6 down                                                 | -        | -        | -        | 3.8 down                                         | 3.5 down | 2.3 down | 2.3 down | 2.3 down |
| um01457 | um11658                                                              | Hmg3 - HMG-box protein Hmg3                                      | Hmg3                                                | PF00505, UniProt                                         | -        | -        | -        | -                                                | -        | 2.1 up   | 2.7 up   | 2.7 up   |
| um01482 | Hypothetical protein                                                 | gal4 Zn clus                                                     | UniProt                                             | -                                                        | -        | -        | -        | 2.7 down                                         | 3.1 down | 2.0 down | 2.0 down | 2.0 down |
| um01523 | Conserved hypothetical protein                                       | Fox1, Fork head                                                  | SUPERFAMILY, UniProt                                | 2.0 down                                                 | -        | -        | 2.1 down | -                                                | -        | 2.2 up   | 2.2 up   | 2.2 up   |
| um01529 | Related to TAF10 - TFIID and SAGA subunit                            | TAF10 - TFIID                                                    | KEGG                                                | -                                                        | 2.1 down | 2.8 down | 2.2 down | -                                                | -        | -        | -        | -        |
| um01556 | Related to transcriptional activator Mut3p                           | FSTF, GAL4                                                       | PF04082, UniProt                                    | 2.0 down                                                 | -        | -        | -        | -                                                | -        | -        | -        | -        |
| um01597 | Hypothetical protein                                                 | hap2                                                             | Mendoza-Mendoza et al. <sup>68</sup>                | 5.2 down                                                 | 2.8 down | 2.6 down | -        | 2.9 down                                         | 2.2 down | -        | -        | -        |
| um01908 | Related to CCAAT-binding transcription factor subunit aab-1          | aab-1                                                            | MIPS <i>Ustilago maydis</i> DataBase                | 11.2 down                                                | 4.1 down | 5.9 down | 3.5 down | 6.5 down                                         | 5.4 down | 2.3 down | 2.3 down | 2.3 down |
| um01925 | um10450                                                              | Related to transcriptional regulator rds2                        | ERT1 gluconeogenic                                  | UniProt                                                  | -        | -        | 2.3 up   | -                                                | -        | -        | -        | -        |
| um01961 | Hypothetical protein                                                 | FSTF, GAL4                                                       | UniProt                                             | -                                                        | -        | 2.2 up   | -        | -                                                | -        | -        | -        | -        |
| um01975 | um11379                                                              | Putative protein                                                 | gal4, Zn clus                                       | UniProt                                                  | 4.8 up   | 2.9 up   | 3.9 up   | 2.8 up                                           | -        | -        | -        | -        |
| um02061 | um11462                                                              | Putative protein                                                 | gal4, Zn clus                                       | UniProt                                                  | -        | -        | 4.8 up   | 2.8 up                                           | -        | -        | 2.5 up   | 2.5 up   |
| um02191 | UM02191.2                                                            | Conserved hypothetical protein                                   | yap1, B-ZIP                                         | PF10297, PF00170                                         | 7.9 down | 5.0 down | 2.5 down | 2.9 down                                         | 5.8 down | 4.6 down | 2.1 down | 2.1 down |
| um02257 | um15078                                                              | Hypothetical protein                                             | gal4, Zn clus                                       | UniProt                                                  | 3.3 down | 2.6 down | 2.1 down | -                                                | 2.4 down | 2.3 down | -        | -        |
| um02280 | Putative protein                                                     | Homeodomain, Heat-shock                                          | SUPERFAMILY, UniProt                                | -                                                        | -        | -        | -        | -                                                | 2.6 down | -        | -        | -        |
| um02301 | Related to C2H2-type zinc finger protein                             | Zf                                                               | PF13465, MIPS <i>Ustilago maydis</i> DataBase       | 26.5 up                                                  | 26.6 up  | 27.1 up  | 30.4 up  | 5.4 up                                           | 4.7 up   | 5.6 up   | 5.6 up   | 5.6 up   |

|         |           |                                                                                                            |                                                |                                                     |          |           |          |          |           |          |          |          |
|---------|-----------|------------------------------------------------------------------------------------------------------------|------------------------------------------------|-----------------------------------------------------|----------|-----------|----------|----------|-----------|----------|----------|----------|
| um02328 | um11705   | Hypothetical protein                                                                                       | TFIID                                          | UniProt                                             | 5.5 down | 5.5 down  | 3.0 down | 2.5 down | 2.1 down  | -        | -        |          |
| um02364 | um10132   | Probable NHP6B - nonhistone chromosomal protein                                                            | NHP6, FACT                                     | UniProt                                             | 2.0 down | -         | -        | -        | -         | -        | -        | 2.9 down |
| um02394 | um10143   | Probable TATA-box-binding factor TBP                                                                       | TBP, TFIID                                     | PF00352, KEGG, UniProt                              | 2.3 up   | 2.2 up    | 2.8 up   | 2.9 up   | 2.5 up    | 2.6 up   | 3.7 up   |          |
| um02510 | um02510.2 | Probable PGU1 - Endo-polygalacturonase                                                                     | pg2                                            | MIPS <i>Ustilago maydis</i> DataBase                | 2.6 up   | 2.1 up    | 2.1 up   |          | 2.8 up    | 2.4 up   |          |          |
| um02582 |           | Rum1 - regulator <i>Ustilago maydis</i> 1 protein (Rum1)                                                   | Rum1, JmjC, TF                                 | MIPS <i>Ustilago maydis</i> DataBase                | -        | -         | -        | -        | 3.1 down  | 2.8 down | 2.2 down |          |
| um02447 | um10159   | Related to transcription activator amyR                                                                    | FSTF, GAL4                                     | UniProt                                             | 2.0 down | -         | -        | -        | 2.3 down  | -        | -        |          |
| um02602 | um10282   | Putative protein                                                                                           | FSTF, GAL4                                     | UniProt                                             | 4.0 down | 2.3 down  | 2.6 down | 2.3 down | -         | 2.4 down | -        |          |
| um02664 |           | Related to zinc finger protein white collar 2 (wc-2)                                                       | zf wc-2                                        | UniProt                                             | -        | 2.3 up    | 2.6 up   | 3.5 up   | -         | -        | 2.8 up   |          |
| um02775 |           | Hypothetical protein                                                                                       | p53-like TF DNA-bd                             | UniProt                                             | 2.3 down | 2.1 down  | -        | -        | -         | -        | -        |          |
| um02827 |           | Conserved hypothetical protein                                                                             | FSTF, GAL4                                     | PF04082, UniProt                                    | 2.6 down | 2.1 down  | 2.1 down | -        | 2.3 down  | 2.1 down | 2.1 down |          |
| um02835 |           | Conserved hypothetical protein                                                                             | TEA                                            | UniProt                                             | -        | 3.9 up    | 3.8 up   | -        | 4.6 up    | 3.1 up   | 5.2 up   |          |
| um02857 |           | Conserved hypothetical protein                                                                             | Znf C2H2                                       | UniProt                                             | -        | -         | -        | -        | 2.1 down  | 2.1 down | -        |          |
| um02896 |           | Putative protein                                                                                           | bZIP                                           | UniProt                                             | 2.6 down | -         | -        | -        | 2.4 down  | 2.6 down | -        |          |
| um02989 |           | Related to IME4 - positive transcription factor for IME2                                                   | IME4                                           | Shah et al. <sup>84</sup>                           | -        | -         | -        | -        | 2.7 up    | 2.2 up   | -        |          |
| um03040 |           | Hypothetical protein                                                                                       | gal4, Zn clus                                  | UniProt                                             | 4.2 up   | 6.9 up    | 7.2 up   | 12.2 up  | 3.6 up    | 3.8 up   | 7.5 up   |          |
| um03053 | um10368   | Related to Heat shock factor protein                                                                       | HSFDOMAIN, Heat-shock                          | SUPERFAMILY, UniProt                                | 6.7 down | 4.9 down  | 7.1 down | 4.4 down | 7.4 down  | 5.8 down | 4.1 down | 4.1      |
| um03079 |           | Related to TAF5 - TFIID and SAGA subunit                                                                   | TAF5 - TFIID                                   | KEGG                                                | 2.2 down | -         | 2.3 down | 2.1 down | 4.1 down  | 3.5 down | 3.3 down | 3.3      |
| um03130 | um10379   | Related to CCR4 - transcriptional regulator involved in carbon catabolite repression (C-terminal fragment) | CCR4, Glucose-repressible, ADH2                | UniProt                                             | -        | -         | -        | -        | 2.1 down  | -        | -        |          |
| um03172 |           | Related to Zinc finger protein                                                                             | Zf rbf1                                        | PF13465                                             | -        | -         | -        | -        | -         | -        | -        |          |
| um03296 |           | Hypothetical protein                                                                                       | bZIP                                           | PF00170, UniProt                                    | 5.6 up   | 15.3 up   | 8.5 up   | 13.7 up  | -         | 2.5 up   | 8.7 up   |          |
| um03346 | um03346.2 | related to SKN7 - transcription factor (C-terminal fragment)                                               | SKN7                                           | MIPS <i>Ustilago maydis</i> DataBase                | -        | -         | 2.1 up   | 3.1 up   | -         | -        | -        |          |
| um03328 | um10654   | Related to TFB5 - component of general transcription and DNA repair factor TFIIF                           | TFB5 TTDA TFIIF                                | PF06331, KEGG, UniProt                              | 2.0 up   | -         | -        | -        | 3.5 up    | 3.6 up   | -        |          |
| um03396 |           | Hypothetical protein                                                                                       | gal4 Zn clus                                   | UniProt                                             | -        | -         | 2.0 up   | -        | -         | -        | 2.1 up   |          |
| um03403 | um03403.2 | Conserved hypothetical protein                                                                             | Znf C2H2                                       | UniProt                                             | -        | -         | 2.6 up   | 2.2 up   | -         | -        | -        |          |
| um03416 |           | Crg1 - carbon source-regulated protein (putative arabinase)                                                | Crg1                                           | MIPS <i>Ustilago maydis</i> DataBase                | 5.4 up   | 4.5 up    | 9.9 up   | 6.6 up   | -         | -        | -        |          |
| um03450 |           | Related to FAP7 - involved in the oxidative stress response                                                | FAP7, TAB9                                     | KEGG                                                | -        | -         | -        | -        | -         | 2.0 up   | -        |          |
| um03509 | um11782   | Putative protein                                                                                           | bZIP                                           | PF00170, UniProt                                    | 3.8 down | 3.4 down  | 3.2 down | 3.1 down | 5.4 down  | 5.5 down | 2.8 down | 2.1      |
| um03514 |           | Putative protein                                                                                           | FSTF, GAL4                                     | UniProt                                             | 2.2 down | -         | -        | -        | 2.4 down  | 2.1 down | -        |          |
| um03568 |           | Related to regulatory protein alcR                                                                         | gal4, Zn clus                                  | UniProt                                             | 4.4 up   | 8.2 up    | 16.5 up  | 13.4 up  | 2.2 up    | 2.2 up   | 3.9 up   |          |
| um03613 |           | Putative protein                                                                                           | FSTF, GAL4                                     | UniProt                                             | 2.1 up   | -         | -        | -        | 2.5 down  | 2.8 down | 2.0 down |          |
| um03672 | um10482   | Probable transcription initiation factor iia gamma chain                                                   | IIA subunit 2                                  | KEGG, SUPERFAMILY, UniProt                          | -        | -         | -        | -        | 3.8 up    | 3.9 up   | 2.1 up   |          |
| um03680 |           | Related to TFA1 - TFIIE subunit (transcription initiation factor), 66 kD                                   | TFA1 - TFIIE1                                  | KEGG                                                | 8.1 down | 8.6 down  | 6.0 down | 5.3 down | 3.2 down  | 3.0 down | 2.2 down |          |
| um03714 |           | Related to lactose regulatory protein                                                                      | FSTF, GAL4                                     | PF04082, UniProt                                    | -        | -         | 2.0 up   | 2.2 up   | -         | -        | -        |          |
| um03802 |           | Related to TAF6 - Subunit (60 kDa) of TFIID and SAGA complexes                                             | TAF6, TAF_TATA-bd                              | KEGG, UniProt                                       | -        | -         | -        | -        | 2.3 down  | -        | -        |          |
| um03843 |           | Putative protein                                                                                           | gal4, Zn clus                                  | UniProt                                             | 2.9 up   | 2.5 up    | 4.9 up   | 3.0 up   | 2.4 up    | -        | 2.1 up   |          |
| um03907 | um11970   | Putative protein                                                                                           | Znf_gata Erythroid transcription factor GATA-1 | SUPERFAMILY                                         | 3.9 down | 3.6 down  | 4.2 down | 4.0 down | 7.8 down  | 6.8 down | 5.4 down | 5.1      |
| um03981 | um11973   | Probable NIT2 - nitrilase                                                                                  | nit2                                           | Horst et al. <sup>29</sup>                          | 2.2 up   | -         | -        | -        | -         | -        | -        |          |
| um04007 |           | Conserved hypothetical protein                                                                             | HMG                                            | PF00505                                             | 2.0 down | -         | -        | -        | -         | -        | -        |          |
| um04024 | um11055   | Conserved hypothetical protein                                                                             | HTH APSES                                      | UniProt                                             | -        | -         | -        | -        | 3.0 down  | 2.6 down | -        |          |
| um04076 |           | Conserved hypothetical protein                                                                             | Znf GATA                                       | SUPERFAMILY, UniProt                                | 2.1 down | -         | 2.8 down | 3.3 down | 3.9 down  | 5.4 down | 4.9 down | 4.1      |
| um04083 |           | Conserved hypothetical protein                                                                             | FSTF, GAL4                                     | PF04082, UniProt                                    | 2.8 down | 2.2 down  | 2.4 down | 2.2 down | -         | 2.4 down | 2.0 down | 2.1      |
| um04101 |           | Related to BAS1 - transcription factor                                                                     | BAS1                                           | MIPS <i>Ustilago maydis</i> DataBase                | -        | -         | -        | -        | 3.2 up    | -        | 2.8 up   |          |
| um04208 |           | Conserved hypothetical protein                                                                             | FSTF, GAL4                                     | UniProt                                             | 9.0 down | 16.0 down | 7.1 down | 6.6 down | 11.1 down | 9.0 down | 6.0 down | 2.1      |
| um04235 | um12255   | Conserved hypothetical protein                                                                             | FSTF, GAL4                                     | Pfam, MIPS <i>Ustilago maydis</i> DataBase, UniProt | 3.2 down | 2.5 down  | 2.1 down | -        | 2.5 down  | 2.7 down | -        |          |
| um04242 |           | Conserved hypothetical protein                                                                             | FSTF, GAL4                                     | PF04082, UniProt                                    | 3.5 down | 2.3 down  | 2.0 down | 2.2 down | -         | -        | -        |          |
| um04252 | um10417   | Related to transcription factor ScGATA-6                                                                   | Znf_gata Erythroid transcription factor GATA-1 | SUPERFAMILY, UniProt                                | -        | -         | -        | -        | 2.7 down  | 2.7 down | 2.2 down |          |
| um04274 | um10426   | PacC - Transcription factor pacC                                                                           | pacC                                           | Arechiga et al. <sup>85</sup>                       | 6.8 down | 6.6 down  | 7.1 down | 6.8 down | 6.9 down  | 6.6 down | 5.2 down | 3.1      |
| um04293 |           | Conserved hypothetical protein                                                                             | gal4, Zn clus                                  | UniProt                                             | -        | 2.4 up    | 3.2 up   | 4.1 up   | -         | -        | -        |          |

|         |           |                                                                           |                                  |                                                     |           |           |           |           |          |          |          |   |
|---------|-----------|---------------------------------------------------------------------------|----------------------------------|-----------------------------------------------------|-----------|-----------|-----------|-----------|----------|----------|----------|---|
| um04412 | um10519   | Putative protein                                                          | bZIP                             | PF00170, UniProt                                    | 2.3 up    | 2.9 up    | 3.7 up    | 4.2 up    | -        | -        | 2.8 up   | 2 |
| um04416 |           | Probable POB3 - protein that binds to DNA polymerase I                    | POB3, FACT                       | UniProt                                             | -         | -         | -         | -         | 2.0 up   | 2.3 up   | 2.9 up   | 2 |
| um04421 |           | Hypothetical protein                                                      | gal4, Zn clus                    | UniProt                                             | 2.5 up    | -         | -         | -         | 2.7 up   | 2.9 up   | -        | 2 |
| um04465 |           | Related to transcription regulator SPT7                                   | SPT7, BromodomainTF              | MIPS <i>Ustilago maydis</i> DataBase                | -         | -         | -         | -         | 2.1 down | 2.1 down | -        | 2 |
| um04688 |           | Conserved hypothetical protein                                            | gal4, Zn clus                    | UniProt                                             | 2.5 up    | 3.6 up    | 5.1 up    | 6.4 up    | -        | -        | 3.0 up   | 3 |
| um04774 | um12004   | Conserved hypothetical protein                                            | Zf_ace                           | PF13465                                             | 2.0 down  | -         | -         | -         | 2.8 down | 3.1 down | 2.5 down | 2 |
| um04806 |           | Conserved hypothetical protein                                            | FSTF, GAL4                       | UniProt                                             | -         | -         | 2.0 up    | 2.1 up    | -        | -        | -        | 3 |
| um04875 |           | Conserved hypothetical protein                                            | Zf                               | PF13465                                             | -         | -         | -         | 2.0 up    | -        | -        | 2.3 up   | 3 |
| um04885 |           | Conserved hypothetical protein                                            | FSTF, GAL4                       | PF04082, UniProt                                    | -         | -         | -         | -         | -        | -        | 3.6 up   | 2 |
| um04902 |           | Cyclin-dependent ser/thr protein kinase                                   | CDK7 kin28                       | KEGG                                                | -         | -         | -         | -         | 3.8 up   | 4.1 up   | 3.5 up   | 2 |
| um04999 |           | Related to RDS2 - Regulator of drug sensitivity                           | RDS2, gal4, Zn clus              | UniProt                                             | 3.9 down  | 4.0 down  | -         | -         | -        | -        | -        | 2 |
| um05050 |           | Hypothetical protein                                                      | gal4, Zn clus                    | UniProt                                             | -         | 2.1 up    | 3.8 up    | 3.1 up    | -        | -        | -        | 2 |
| um05054 |           | Conserved hypothetical protein                                            | Fork head                        | SUPERFAMILY, UniProt                                | 2.1 down  | 2.1 down  | 2.0 down  | -         | 2.6 down | 2.6 down | -        | 2 |
| um05144 | um10181   | Conserved hypothetical protein                                            | Ace2                             | MIPS <i>Ustilago maydis</i> DataBase                | 2.5 down  | 2.4 down  | -         | -         | -        | -        | -        | 2 |
| um05151 |           | Related to Cyclin H                                                       | CCNH, Cyclin H                   | KEEG                                                | -         | -         | 2.1 down  | -         | -        | -        | -        | 2 |
| um05182 |           | Hypothetical protein                                                      | HSFDOMAIN, Heat-shock            | SUPERFAMILY, UniProt                                | 4.7 down  | 5.4 down  | 3.8 down  | 2.6 down  | -        | -        | -        | 2 |
| um05183 |           | Related to TOA1 - transcription factor TFIIA-L                            | TOA1 "TFIIA-L" "TFIIA1           | KEGG, SUPERFAMILY, UniProt                          | 2.3 up    | 2.2 up    | 2.8 up    | 2.7 up    | 3.8 up   | 3.5 up   | 3.3 up   | 3 |
| um05274 |           | Related to Heat shock factor protein 4                                    | HSFDOMAIN, Heat-shock            | SUPERFAMILY, UniProt                                | 3.0 up    | 3.2 up    | 3.7 up    | 4.3 up    | -        | -        | -        | 2 |
| um05281 | um10551.2 | Probable SSL1 - TFIIH subunit (transcription initiation factor), factor B | SSL1 - TFIIH2                    | KEGG                                                | -         | 2.2 down  | 2.0 down  | -         | -        | -        | -        | 2 |
| um05338 |           | Related to transcription factor MBP1                                      | MBP1                             | UniProt                                             | -         | -         | -         | -         | 3.7 down | 3.9 down | 4.2 down | 3 |
| um05401 |           | Conserved hypothetical protein                                            | FSTF, GAL4                       | UniProt                                             | 3.6 down  | 2.7 down  | 4.2 down  | 2.9 down  | 8.2 down | 8.7 down | 4.3 down | 8 |
| um05483 | um12303   | Hypothetical protein                                                      | gal4, Zn clus                    | UniProt                                             | -         | -         | 3.5 up    | 6.0 up    | -        | -        | -        | 2 |
| um05515 |           | Hypothetical protein                                                      | gal4, Zn clus                    | UniProt                                             | -         | -         | -         | -         | 2.0 down | 2.1 down | -        | 2 |
| um05518 |           | Hypothetical protein                                                      | Znf_GATA                         | UniProt                                             | 2.2 down  | 2.1 down  | -         | -         | 2.3 down | 2.4 down | -        | 2 |
| um05577 |           | Conserved hypothetical protein                                            | Znf_GATA                         | UniProt                                             | -         | -         | -         | -         | 2.0 down | -        | -        | 2 |
| um05578 | um11176   | Conserved hypothetical protein                                            | bZIP                             | PF00170, UniProt                                    | 3.5 down  | 2.9 down  | 2.8 down  | 2.7 down  | 4.6 down | 4.8 down | 3.5 down | 3 |
| um05601 |           | Hypothetical protein                                                      | FSTF, GAL4                       | PF04082, UniProt                                    | 2.3 down  | 2.0 down  | 2.5 down  | 2.5 down  | -        | -        | -        | 2 |
| um05694 |           | Hypothetical protein                                                      | bZIP                             | PF00170, UniProt                                    | 3.2 up    | 2.5 up    | -         | -         | 2.0 up   | 2.1 up   | 2.2 up   | 2 |
| um05723 | um10941   | Conserved hypothetical protein                                            | gal4, Zn clus                    | UniProt                                             | -         | -         | -         | -         | -        | -        | 2.3 up   | 2 |
| um05762 | um12024   | Putative protein                                                          | Homeodomain, hdp1                | PF00046, UniProt                                    | -         | -         | 5.6 up    | 2.0 up    | -        | -        | -        | 2 |
| UM05770 |           | Tsd2 - TSD2 protein, required for DNA replication                         | TSD2, CDC45                      | UniProt                                             | -         | -         | -         | -         | -        | -        | -        | 2 |
| um05773 |           | Putative protein                                                          | Znf_GATA                         | UniProt                                             | 4.0 down  | 2.5 down  | 3.7 down  | 2.3 down  | 7.4 down | 6.1 down | 5.2 down | 3 |
| um05801 |           | Related to C2H2 zinc finger protein                                       | Znf_C2H2                         | UniProt                                             | -         | 2.1 down  | -         | -         | -        | -        | -        | 2 |
| um05820 |           | Hypothetical protein                                                      | gal4, Zn clus                    | UniProt                                             | 2.3 up    | 3.0 up    | 2.0 up    | 2.8 up    | -        | -        | 2.4 up   | 2 |
| um05854 |           | Conserved hypothetical protein                                            | EAF1, Helicase, Homeodomain-like | UniProt                                             | 2.1 down  | -         | -         | -         | 2.0 down | -        | -        | 2 |
| um05888 |           | Related to transcription elongation factor TFIIIS                         | TFIIIS                           | PF08711                                             | -         | 2.2 down  | -         | -         | -        | 2.3 up   | 2.3 up   | 2 |
| um05937 |           | Putative Cys(2)His(2) zinc finger protein                                 | Znf23                            | MIPS                                                | 2.7 up    | 2.7 up    | 4.4 up    | 2.6 up    | -        | -        | -        | 2 |
| um05966 |           | Conserved hypothetical protein                                            | FSTF, GAL4                       | UniProt                                             | 13.7 up   | 12.7 up   | 17.6 up   | 16.3 up   | 7.7 up   | 6.1 up   | 6.5 up   | 1 |
| um06025 | um12033   | Rop1 - HMG-box transcription factor (C-terminal fragment)                 | rop1                             | Brefort et al. <sup>86</sup>                        | -         | -         | 3.1 up    | -         | -        | -        | -        | 2 |
| um06115 | um11211   | Conserved hypothetical protein                                            | cut1                             | MIPS <i>Ustilago maydis</i> DataBase                | -         | 2.3 down  | 2.0 down  | -         | -        | -        | -        | 2 |
| um06160 | um11298   | Related to NHP6B - nonhistone chromosomal protein                         | HMG, NHP6B                       | PF00505                                             | 3.3 down  | 2.8 down  | 2.4 down  | 2.6 down  | 3.3 down | 4.4 down | 4.9 down | 3 |
| um06196 | um11222   | Related to MBP1 - transcription factor, subunit of the MBF factor         | MBP1                             | MIPS <i>Ustilago maydis</i> DataBase, UniProt       | -         | -         | -         | -         | 2.5 down | -        | -        | 2 |
| um06231 |           | Conserved hypothetical protein                                            | Fork head                        | SUPERFAMILY, UniProt                                | -         | -         | -         | -         | -        | -        | -        | 2 |
| um06256 |           | Hypothetical protein                                                      | FSTF, GAL4                       | UniProt                                             | -         | -         | -         | -         | 2.5 down | 2.5 down | 2.3 down | 2 |
| um06257 |           | Conserved hypothetical protein                                            | FSTF, GAL4                       | UniProt                                             | 3.3 down  | 3.7 down  | 3.1 down  | 2.8 down  | 3.0 down | 2.8 down | 3.0 down | 2 |
| um06278 |           | Conserved hypothetical protein                                            | gal4, Zn clus                    | UniProt                                             | -         | -         | -         | 2.8 up    | -        | -        | -        | 2 |
| um06280 |           | Related to J kappa-recombination signal binding protein                   | J kappa-recombination            | UniProt                                             | 2.1 down  | -         | -         | -         | -        | 2.4 down | -        | 2 |
| um06283 | um12332   | Conserved hypothetical protein                                            | Homeodomain                      | PF00046, UniProt                                    | 15.1 down | 13.6 down | 14.4 down | 13.0 down | 8.7 down | 8.3 down | 9.8 down | 6 |
| um06296 |           | Probable TFB2 - TFIIH subunit (transcription/repair factor)               | TFB2 - TFIIH4                    | KEGG                                                | -         | -         | -         | -         | 2.0 up   | -        | 2.0 up   | 2 |
| um06385 |           | Conserved hypothetical protein                                            | bZIP                             | PF00170, UniProt                                    | 2.3 down  | 2.5 down  | 2.2 down  | 2.2 down  | -        | -        | -        | 2 |
| um06493 |           | Conserved hypothetical protein                                            | FSTF, gal4 Zn_clus               | Pfam, MIPS <i>Ustilago maydis</i> DataBase, UniProt | 2.1 up    | 2.5 up    | 2.7 up    | 2.0 up    | -        | -        | 2.3 up   | 2 |
